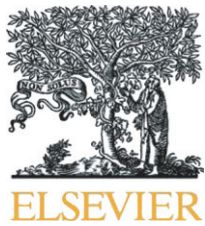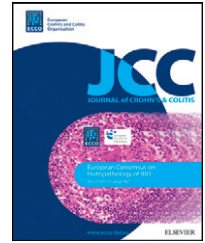

SPECIAL ARTICLE

# When do we dare to stop biological or immunomodulatory therapy for Crohn's disease? Results of a multidisciplinary European expert panel

Valerie Pittet <sup>a,\*</sup>, Florian Froehlich <sup>b, c</sup>, Michel H. Maillard <sup>b</sup>, Christian Mottet <sup>a, b, d</sup>, Jean-Jacques Gonvers <sup>b</sup>, Christian Felley <sup>e</sup>, John-Paul Vader <sup>a</sup>, Bernard Burnand <sup>a</sup>, Pierre Michetti <sup>b, e</sup>, Alain Schoepfer <sup>b</sup> the EPACT-II Update Panellists <sup>1</sup>

<sup>a</sup> Healthcare Evaluation Unit, Institute of Social & Preventive Medicine (IUMSP), Lausanne University Hospital, Lausanne, Switzerland

<sup>b</sup> Department of Gastroenterology & Hepatology, Lausanne University Hospital, Lausanne, Switzerland

<sup>c</sup> Division of Gastroenterology & Hepatology, University Hospital Basle, Basle, Switzerland

<sup>d</sup> Division of Gastroenterology, Hôpital Neuchâtelois, Neuchâtel, Switzerland

<sup>e</sup> Crohn and Colitis Center, Clinique La Source-Beaulieu, Lausanne, Switzerland

Received 5 April 2013; accepted 15 April 2013

## KEYWORDS

Crohn's disease;  
Azathioprine;  
Anti-TNF drugs;  
Treatment cessation;  
Treatment stopping rules

## Abstract

**Background:** Safety and economic issues have increasingly raised concerns about the long term use of immunomodulators or biologics as maintenance therapies for Crohn's disease (CD). Despite emerging evidence suggesting that stopping therapy might be an option for low risk patients, criteria identifying target groups for this strategy are missing, and there is a lack of recommendations regarding this question.

**Methods:** Multidisciplinary European expert panel (EPACT-II Update) rated the appropriateness of stopping therapy in CD patients in remission. We used the RAND/UCLA Appropriateness Method, and included the following variables: presence of clinical and/or endoscopic remission, CRP level, fecal calprotectin level, prior surgery for CD, and duration of remission (1, 2 or 4 years).

☆ Conference presentation: this work was selected as one of the best abstracts at ECCO Congress in Vienna, on February 14–16, 2013, and results were presented orally in a session of the main scientific program.

\* Corresponding author at: Healthcare Evaluation Unit, Institute of Social & Preventive Medicine (IUMSP), Biopôle 2, Route de la Corniche 10, CH-1010 Lausanne, Switzerland. Tel.: +41 21 314 72 82; fax: +41 21 314 49 54.

E-mail addresses: [Valerie.Pittet@chuv.ch](mailto:Valerie.Pittet@chuv.ch) (V. Pittet), [florian.froehlich@bluewin.ch](mailto:florian.froehlich@bluewin.ch) (F. Froehlich), [Michel.Maillard@chuv.ch](mailto:Michel.Maillard@chuv.ch) (M.H. Maillard), [christian.mottet@h-ne.ch](mailto:christian.mottet@h-ne.ch) (C. Mottet), [Jean-Jacques.Gonvers@chuv.ch](mailto:Jean-Jacques.Gonvers@chuv.ch) (J.-J. Gonvers), [cfelley@gesb.ch](mailto:cfelley@gesb.ch) (C. Felley), [John-Paul.Vader@chuv.ch](mailto:John-Paul.Vader@chuv.ch) (J.-P. Vader), [Bernard.Burnand@chuv.ch](mailto:Bernard.Burnand@chuv.ch) (B. Burnand), [pmichetti@gesb.ch](mailto:pmichetti@gesb.ch) (P. Michetti), [Alain.Schoepfer@chuv.ch](mailto:Alain.Schoepfer@chuv.ch) (A. Schoepfer).

<sup>1</sup> See Appendix A.

**Results:** Before considering withdrawing therapy, the prerequisites of a C-reactive protein (CRP) and fecal calprotectin measurement were rated as "appropriate" by the panellists, whereas a radiological evaluation was considered as being of "uncertain" appropriateness. Ileo-colonoscopy was considered appropriate 1 year after surgery or after 4 years in the absence of prior surgery. Stopping azathioprine, 6-mercaptopurine or methotrexate mono-therapy was judged appropriate after 4 years of clinical remission. Withdrawing anti-TNF mono-therapy was judged appropriate after 2 years in case of clinical and endoscopic remission, and after 4 years of clinical remission. In case of combined therapy, anti-TNF withdrawal, while continuing the immunomodulator, was considered appropriate after two years of clinical remission.

**Conclusion:** A multidisciplinary European expert panel proposed for the first time treatment stopping rules for patients in clinical and/or endoscopic remission, with normal CRP and fecal calprotectin levels.

© 2013 European Crohn's and Colitis Organisation. Published by Elsevier B.V. All rights reserved.

## Contents

|                                                            |     |
|------------------------------------------------------------|-----|
| 1. Introduction . . . . .                                  | 821 |
| 2. Materials and methods . . . . .                         | 822 |
| 2.1. Use of the RAND/UCLA appropriateness method . . . . . | 822 |
| 2.2. Variables and definitions . . . . .                   | 822 |
| 3. Results . . . . .                                       | 822 |
| 3.1. Epact-II-Update Panel. . . . .                        | 822 |
| 3.2. Tools to monitor disease activity . . . . .           | 822 |
| 3.3. Treatment withdrawal . . . . .                        | 823 |
| 4. Discussion . . . . .                                    | 823 |
| Acknowledgments . . . . .                                  | 825 |
| Appendix A . . . . .                                       | 825 |
| References . . . . .                                       | 825 |

## 1. Introduction

The important question of when and whether to stop treatment in Crohn's disease (CD) has so far received only limited attention in clinical trials, in contrast to the topics of induction of remission and of maintenance therapy. The decision as to whether a specific maintenance treatment should be continued is guided, as is the case in all therapeutic decisions, by balancing expected benefits against potential risks.

Biological and immunosuppressive therapies represent a significant progress in the treatment of Crohn's disease and have profoundly influenced clinical practice. The benefits of azathioprine, 6-mercaptopurine<sup>1,2</sup> and methotrexate<sup>3</sup> as well as anti TNF<sup>4–11</sup> on the prevention of relapses have been demonstrated in several randomized controlled trials. In a multicenter, randomized, enhance double blind, non-inferiority withdrawal trial on 40 (vs. 43) CD patients in remission induced by azathioprine for over 3.5 years, the mean relapse rate after 1.5 years of follow-up was three times higher in patients who stopped azathioprine compared to those continuing the drug.<sup>12</sup> In an extension study of 66 patients who stopped azathioprine, 63% did, however, suffer a relapse within 5 years, as did 39% of the subgroup of patients presenting no known risk factors (CRP level < 20 mg/l or neutrophil count < 4.0 · 10<sup>9</sup>/l or haemoglobin level > 12 g/dl)<sup>13</sup>; retreatment with azathioprine in the event of relapse was, however, successful in 80%

of patients. On the other hand, Louis et al. showed that, in a prospective study of 115 CD patients in remission without steroids for at least 6 months, treated for more than a year with a combined therapy of infliximab and an immunomodulator,<sup>14</sup> infliximab withdrawal had an overall 1-year relapse rate of 44%, but only 15% for those patients who present no more than two risk factors (male gender, absence of surgical resection, leukocyte count > 6 G/L, fecal calprotectin > 300 µg/g). Retreatment was also effective in 88% of patients who suffered a relapse. In addition, safety issues such as infections and neoplasia in the context of long-term immunomodulatory and anti-TNF, mostly in the case of combination therapy,<sup>4</sup> are still of significant concern to both patients and physicians. Hence, higher risks of lymphoproliferative disorders<sup>15–17</sup> and non-melanoma skin cancer<sup>18</sup> have been documented in patients receiving long-term immunosuppressive drugs.<sup>19</sup> Furthermore, the significant cost of anti-TNF treatment is of increasing concern in the current climate of budget constraints in healthcare systems.

Thus, establishing clear recommendations on how to identify patients eligible for a "drug holiday" is urgently needed. A multidisciplinary European expert panel (EPACT-II) convened in 2007 to develop explicit appropriateness criteria<sup>20–23</sup> regarding CD treatment. During an update meeting in October 2012, the panel evaluated when and under which conditions it was appropriate to consider withdrawal of CD treatment.

## 2. Materials and methods

### 2.1. Use of the RAND/UCLA appropriateness method

An appropriate medical procedure is defined as one in which the expected health benefits exceed the expected negative consequences, exclusive of any cost considerations.<sup>24</sup> We used the RAND/UCLA appropriateness method to assess appropriateness of stopping CD treatment. This method has previously been used to develop criteria for the appropriateness of many and sundry healthcare treatments, often when in situations where clear-cut evidence obtained through well-conducted clinical trials or high-quality observational studies is lacking. The method "is arguably the most respected approach to defining appropriate care".<sup>25</sup> The method comprised five steps<sup>1</sup>: a comprehensive literature review,<sup>2</sup> the selection of a multidisciplinary panel expert,<sup>3</sup> the identification of main clinical situations, each comprising a set of scenarios corresponding to typical patients,<sup>4</sup> a first individual rating round,<sup>5</sup> and a panel meeting with a second re-rating round of all scenarios.

The first European Panel on the Appropriateness of Treatment of Crohn's disease (EPACT-I) convened in 2004, followed by an update in 2007 (EPACT-II).<sup>20–23</sup> In October 2012 an EPACT-II Update Panel, formally endorsed by the European Crohn & Colitis Organisation ECCO, convened to examine scenarios for which evidence had changed since 2007. In addition, the timely issue of when to withdraw long-term therapy with immunomodulators (azathioprine, 6-mercaptopurine, methotrexate) and/or anti-TNF drugs was assessed. Relevant articles published between 2007 and 2012 were retrieved, to complement and update the review previously performed for the 2007 EPACT-II Panel. Clinical scenarios reflecting real practice were formulated in 2007 and modified for the EPACT-II Update Panel as necessary, taking into account current evidence. For each of these scenarios, experts rated the level of appropriateness on a 9-point scale (1 = extremely inappropriate, 5 = uncertain, 9 = extremely appropriate), based on the available published evidence and their own expertise.

Appropriateness was calculated using the median of ratings and categorized as inappropriate (median 1 to 3), uncertain (median 4 to 6) and appropriate (median 7 to 9). The disagreement between panellists was calculated using the IPRAS method,<sup>26</sup> defined as  $IPRAS = 2.35 + (AI * 1.5)$ , where AI is an index of asymmetry defined by  $AI = \text{abs}(5 - (p70 + p30)/2)$ . This index was defined to provide a disagreement assessment as close as possible to the classic definition of  $\geq 3$  ratings in each extreme (1-3 and 7-9) for a panel of 9 panellists. An indication was rated with disagreement when the inter-percentile range (IPR) between percentiles p30 and p70 was larger than IPRAS. In the case of disagreement between panellists, the indication was considered of uncertain appropriateness.

### 2.2. Variables and definitions

The parameters considered for the assessment of the decision to withdraw therapy were as follows: presence of clinical and/or endoscopic remission, evaluated by colonoscopy, imaging techniques (preferentially MRI or US, but other methods may also apply),<sup>27</sup> CRP and fecal calprotectin

level measurements<sup>28</sup>; length of remission under treatment (1, 2 or 4 years); and prior surgery for CD. Prior to considering therapy withdrawal at 1, 2 or 4 years, the panellists evaluated the appropriateness of assessing the following parameters to aid in the decision to stop CD therapy: imaging, CRP level, fecal calprotectin level, and endoscopic evaluation.

Stopping rules were assessed for patients with immunomodulatory treatments (azathioprine, 6-mercaptopurine, methotrexate) or anti-TNF drugs (infliximab, adalimumab, certolizumab pegol) or combined therapy (combined use of one immunomodulator and of one anti-TNF drug). For combined therapy the panellists evaluated the appropriateness of withdrawing the anti-TNF drug while continuing the immunomodulator.

The panellist agreed on the following definitions: clinical remission was defined as Crohn's Disease Activity Index CDAI < 150); endoscopic remission was defined as absence of endoscopic lesions (erosions and/or ulcers) at ileo-colonoscopy; deep remission was defined as clinical and endoscopic remission as well as biochemical remission (CRP < 5 mg/l, fecal calprotectin < 50 µg/g).

## 3. Results

### 3.1. Epact-II-Update Panel

Ten European experts – eight gastroenterologists and two surgeons (listed in [Appendix A](#)) – convened in Zurich on the 5th of October 2012 for a one-day meeting. They rated a total of 1030 clinical scenarios, of which 216 focused on modalities used to assess remission and treatment withdrawal ([Table 1](#)).

### 3.2. Tools to monitor disease activity

CRP and fecal calprotectin level measurements were judged to represent appropriate surrogate markers to monitor clinical and/or endoscopic remission in luminal ileocolonic CD patients with or without prior CD-related surgery ([Tables 2](#) and [3](#)). Imaging techniques were considered appropriate in patients with prior CD-related surgery, and who were in clinical remission under combination therapy alone (anti-TNF +

**Table 1** Main clinical CD presentations.

| Main clinical presentation                                     | Number of clinical scenarios |
|----------------------------------------------------------------|------------------------------|
| Mild- to low-moderate active luminal CD                        | 96                           |
| High-moderate to severe CD                                     | 48                           |
| Steroid-dependent & refractory CD                              | 42                           |
| Fistulizing CD                                                 | 45                           |
| Maintenance of medically-induced remission of CD               | 495                          |
| Maintenance of surgically-induced remission of CD              | 72                           |
| Extra-intestinal manifestation of CD                           | 16                           |
| Monitoring modalities for luminal ileo-colonic CD in remission | 168                          |
| Stopping rules for patients in remission                       | 48                           |

Table 2 Appropriateness of monitoring modalities for luminal ileocolonic CD in clinical remission with (A) or without (B) prior CD related surgery. Color code: yellow = uncertain, green = appropriate.

| (A)                |        | Time of assessment |        |     |            |
|--------------------|--------|--------------------|--------|-----|------------|
| Modalities         | Year 1 |                    | Year 2 |     | Year 4     |
| Ileo-colonoscopy   | (a, c) | (b)                |        |     |            |
| Imaging techniques |        |                    | (a, b) | (c) | (a, b) (c) |
| CRP                |        |                    |        |     |            |
| Calprotectin       |        |                    |        |     |            |

  

| (B)                |        | Time of assessment |        |  |        |
|--------------------|--------|--------------------|--------|--|--------|
| Modalities         | Year 1 |                    | Year 2 |  | Year 4 |
| Ileo-colonoscopy   |        |                    |        |  |        |
| Imaging techniques |        |                    |        |  |        |
| CRP                |        |                    |        |  |        |
| Calprotectin       |        |                    |        |  |        |

Patients treated with (a): azathioprine/6MP, methotrexate, (b): anti-TNF only, (c): anti-TNF + immunomodulator.

immunomodulator). For a patient in clinical and endoscopic remission, or in clinical remission only without any previous CD-related surgery, imaging techniques were judged as uncertain monitoring tools. Performing an ileo-colonoscopy was considered appropriate at year 1, but only for patients with anti-TNF therapy, with or with an immunomodulator or without previous CD-related surgery. At year 4, ileo-colonoscopy was considered appropriate to monitor endoscopic remission, irrespective of the type of maintenance therapy and the prior history of CD-related surgery.

### 3.3. Treatment withdrawal

The panel judged it “appropriate” to stop maintenance treatment of azathioprine/6MP, methotrexate, or an anti-TNF

Table 3 Appropriateness of monitoring modalities for luminal ileocolonic CD in clinical and endoscopic remission for a patient with or without prior CD related surgery, treated with azathioprine/6MP, methotrexate, anti-TNF +/- immunomodulator. Color code: yellow = uncertain, green = appropriate.

|                    |        | Time of assessment |        |  |        |
|--------------------|--------|--------------------|--------|--|--------|
| Modalities         | Year 1 |                    | Year 2 |  | Year 4 |
| Imaging techniques |        |                    |        |  |        |
| CRP                |        |                    |        |  |        |
| Calprotectin       |        |                    |        |  |        |

drug, with or without an immunomodulator, after 4 years for luminal ileocolonic CD patients in clinical remission who had prior CD related surgery (Table 4) or who were in clinical and endoscopic remission (Table 5). The time grid proposed was 1, 2 and 4 years of disease course. It was assumed that patients were taking maintenance therapy resulting in clinical or clinical and endoscopic remission for the entire period of the time grid. The withdrawal of anti-TNF therapy was considered appropriate after 4 years for patients in clinical remission only, and after 2 years for patients in clinical and endoscopic remission. For patients under combined maintenance therapy, stopping the anti-TNF drug was judged appropriate after 2 years of clinical and/or endoscopic remission.

## 4. Discussion

This article reports how international IBD experts, the EPACT-II Update panel, recommended monitoring Crohn’s patients under maintenance therapy with immunomodulators and/or anti-TNF drugs, and at which time points they would consider it appropriate to stop these treatments while basing their decisions on biological and endoscopic monitoring parameters. The decisions include the use of monitoring tools themselves defined by appropriateness scenarios. For patients in clinical and endoscopic remission or with prior CD-related surgery, the panel judged appropriate to stop a biological or immunosuppressive maintenance treatment after 4 years. The panel also considered appropriate to stop biological therapy, being given alone or in combination therapy, after 2 years for patients in clinical and endoscopic remission.

While most of the scientific efforts have been spent in studies assessing the potential of different drugs to induce and maintain remission in Crohn’s disease, stopping rules of biological and immunosuppressive therapy have not

Table 4 Appropriateness of treatment withdrawal for luminal ileocolonic CD in clinical remission only for a patient with (A) or without (B) prior CD related surgery. Color code: red = inappropriate, yellow = uncertain, green = appropriate.

| (A)                        |        | Time of assessment |        |  |        |
|----------------------------|--------|--------------------|--------|--|--------|
| Treatment                  | Year 1 |                    | Year 2 |  | Year 4 |
| Azathioprine/6MP           |        |                    |        |  |        |
| Methotrexate               |        |                    |        |  |        |
| Anti-TNF                   |        |                    |        |  |        |
| Anti-TNF + immunomodulator |        |                    |        |  |        |

  

| (B)                        |        | Time of assessment |        |  |        |
|----------------------------|--------|--------------------|--------|--|--------|
| Treatment                  | Year 1 |                    | Year 2 |  | Year 4 |
| Azathioprine/6MP           |        |                    |        |  |        |
| Methotrexate               |        |                    |        |  |        |
| Anti-TNF                   |        |                    |        |  |        |
| Anti-TNF + immunomodulator |        |                    |        |  |        |

**Table 5** Appropriateness of treatment withdrawal for luminal ileocolonic CD in clinical and endoscopic remission for a patient with or without prior CD related surgery. Color code: red = inappropriate, yellow = uncertain, green = appropriate.

| Treatment                  | Time of assessment |        |        |
|----------------------------|--------------------|--------|--------|
|                            | Year 1             | Year 2 | Year 4 |
| Azathioprine/6MP           |                    |        |        |
| Methotrexate               |                    |        |        |
| Anti-TNF                   |                    |        |        |
| Anti-TNF + immunomodulator |                    |        |        |

previously been conceptualized. Expected benefits and risks of treatment, according to the best published evidence, should however drive the decision to dare stopping such treatments. Moreover, all healthcare systems are currently facing major budget constraints. Policymakers may become critical regarding the appropriateness of indication and overall duration of costly treatments. When to stop such treatment is thus of similar importance as when to start it, in particular for a chronic, destructive, progressive and potentially disabling, life-long condition like Crohn's disease. For instance, the risk of developing lymphoma and non-melanoma cutaneous tumors is increasing over time under azathioprine treatment.<sup>15–18</sup> Trials investigating the consequences of immunosuppressive or biological therapy withdrawal<sup>12,14,29</sup> have defined the background relapse risk and related factors. The time limit of four years suggested to the panellists' assessment was set in analogy to studies evaluating the outcome after withdrawal of azathioprine. There are no established guidelines regarding the duration for biological treatments in inflammatory bowel diseases and scant evidence exists to guide the clinician in making the decision to stop treatment. It has been shown that clinical relapse occurs frequently when biological or immunosuppressive therapy is stopped.<sup>30</sup> Relapse predictive factors have been identified in an azathioprine withdrawal trial<sup>12</sup>: CRP levels > 20, steroid-free disease course < 50 months, and hemoglobin levels < 12 g/dl. In patients receiving combined treatment with azathioprine and infliximab, withdrawal of infliximab resulted in a 50% relapse rate within one year.<sup>14</sup> Risk factors for relapse included male sex, absence of prior surgery, leukocytes count > 6 × 10<sup>9</sup>/l, hemoglobin levels < 145 g/l, CRP levels > 5.0 mg/l, and fecal calprotectin levels > 300 µg/g. In the study of Louis et al., patients presenting no more than two risk factors had a much lower relapse rate (15%).

Patients may benefit from treatment discontinuation when remission is envisioned beyond the control of clinical symptoms. In contrast to conditions such as rheumatoid arthritis, this new concept is just emerging in inflammatory bowel disease, implying a state of remission with little or no risk of progression.<sup>31</sup> Ultimately, deep remission might impact on the disability of the patients and their need for surgery.<sup>32</sup> There is no widely accepted definition of deep remission. Most clinicians would accept that these patients experience both an excellent control of clinical symptoms coupled with endoscopic remission (mucosal healing, i.e.,

absence of any endoscopic lesions).<sup>32–37</sup> The definition of deep remission is of particular importance in CD, as the correlation between clinical symptoms and endoscopic activity is weak: endoscopic assessment is therefore mandatory. It has to be acknowledged that the EPACT-II Update Panel did not focus on fine-tuning the definition of deep remission as such. We did not, for example, focus on whether minor endoscopic lesions, histological inflammatory abnormalities or supra-normal values of calprotectin in an asymptomatic patient would still be considered as deep remission.

Monitoring of biological parameters (CRP, calprotectin) was unanimously recommended after 1, 2 and 4 years if therapy withdrawal were to be considered. Colonoscopy was uniformly proposed at 4 years. Surprisingly, colonoscopy was deemed appropriate after 1 year of treatment but uncertain at 2 years, which probably reflects the current practice of assessing mucosal healing at 1 year in patients treated with immunosuppressive and/or biological therapy. Furthermore, patients in remission at 1 year are very likely to remain in remission at 2 years also, explaining why colonoscopy is thus not mandatory at year 2. Imaging techniques (CT, MRI) were considered of uncertain appropriateness for disease monitoring in remission, probably because they do not allow direct assessment of the mucosa.

For patients in remission treated with azathioprine, 6-MP or methotrexate, treatment discontinuation was considered appropriate and safe after 4 years. It was agreed that this decision could easily be taken if the patient was in deep remission. In the case of biological therapy, the experts considered stopping therapy appropriate after 4 years but also after 2 years if the patient was in deep remission. This may seem surprising as the mean duration of biological therapy reported in the study by Louis et al. was only 2.2 years, while relapse occurred in 50% after the stop of infliximab. The experts' decision to consider that benefits exceeded risks was guided not only by the aforementioned evidence but also by considerations such as quality of life for not being under the constraint of following a therapy, side effects, reducing the risk of treatment's untoward consequences and the high response rate (88%) of relapsing patients if therapy needs to be resumed.<sup>14</sup> There were no major differences in the judgement to stop therapy, whether patients had undergone prior CD-related surgery or not.

In conclusion, stopping immunosuppressive, biological or combined therapy in CD patients with deep clinical, biological and endoscopic remission was judged to be justified for all treatment categories after 4 years. Known risk factors for relapse after therapy withdrawal<sup>12,14</sup> allow the clinician to optimize this decision in individual cases. The high response rate after reintroduction of therapy in the event of relapse, the significant cost of biological therapy and the side effect profile of immunosuppressive and biological therapy are likely to be the major determinants in decision making. This study highlights a new concept, i.e., the most appropriate time interval before stopping therapy in patients with deep remission. The safety and actual risk/benefit ratio of therapy withdrawal needs to be studied in prospective controlled trials, given the need to optimize the use and duration of potentially risky and costly therapies.

## Acknowledgments

This study was carried out by all the gastroenterologists and investigators listed in Appendix A. The study is supported by the Swiss National Science Foundation (SNSF) grants no. 33CS30-134274 (Swiss IBD cohort study) and 32473B-138498 (Appropriateness of care in IBD).

Statement of authorship: study design and conception (VP, FF, MM, CM, JJG, CF, JPV, BB, PM, AS), statistical analysis (VP), analysis and interpretation (VP, FF, MM, CM, JJG, JPV, BB, PM, AS), drafting the article or revising it critically for important intellectual content (VP, FF, MM, CM, JJG, CF, JPV, BB, PM, AS), final reading and approval of the manuscript (VP, FF, MM, CM, JJG, CF, JPV, BB, PM, AS).

## Appendix A. The EPACT-II-Update panellists

Dr. Erika Angelucci (Italy), Prof. Willem A. Bemelman (The Netherlands), Prof. Bruno Bonaz (France), Prof. Peter Lakatos (Hungary), Prof. Milan Lukas (Czech Republic), Prof. Gerassimos Mantzaris (Greece), Prof. Colm O'Morain (Ireland), Prof. Tom Öresland (Norway), Prof. Laurent Peyrin-Biroulet (France), Prof. Bernhard Sauter (Switzerland).

## References

- Prefontaine E, Sutherland LR, Macdonald JK, Cepoiu M. Azathioprine or 6-mercaptopurine for maintenance of remission in Crohn's disease. *Cochrane Database Syst Rev* 2009;CD000067.
- Hindorf U, Johansson M, Eriksson A, Kvifors E, Almer SH. Mercaptopurine treatment should be considered in azathioprine intolerant patients with inflammatory bowel disease. *Aliment Pharmacol Ther* 2009;29:654–61.
- Feagan BG, Fedorak RN, Irvine EJ, Wild G, Sutherland L, Steinhart AH, et al. A comparison of methotrexate with placebo for the maintenance of remission in Crohn's disease. North American Crohn's Study Group Investigators. *N Engl J Med* 2000;342:1627–32.
- Colombel JF, Sandborn WJ, Reinisch W, Mantzaris GJ, Kornbluth A, Rachmilewitz D, et al. Infliximab, azathioprine, or combination therapy for Crohn's disease. *N Engl J Med* 2010;362:1383–95.
- Colombel JF, Sandborn WJ, Rutgeerts P, Enns R, Hanauer SB, Panaccione R, et al. Adalimumab for maintenance of clinical response and remission in patients with Crohn's disease: the CHARM trial. *Gastroenterology* 2007;132:52–65.
- Colombel JF, Sandborn WJ, Rutgeerts P, Kamm MA, Yu AP, Wu EQ, et al. Comparison of two adalimumab treatment schedule strategies for moderate-to-severe Crohn's disease: results from the CHARM trial. *Am J Gastroenterol* 2009;104:1170–9.
- Hanauer SB, Feagan BG, Lichtenstein GR, Mayer LF, Schreiber S, Colombel JF, et al. Maintenance infliximab for Crohn's disease: the ACCENT I randomised trial. *Lancet* 2002;359:1541–9.
- Schnitzler F, Fidler H, Ferrante M, Noman M, Arijis I, Van Assche G, et al. Long-term outcome of treatment with infliximab in 614 patients with Crohn's disease: results from a single-centre cohort. *Gut* 2009;58:492–500.
- Schreiber S, Colombel JF, Bloomfield R, Nikolaus S, Scholmerich J, Panes J, et al. Increased response and remission rates in short-duration Crohn's disease with subcutaneous certolizumab pegol: an analysis of PRECISE 2 randomized maintenance trial data. *Am J Gastroenterol* 2010;105:1574–82.
- Schreiber S, Khaliq-Kareemi M, Lawrance IC, Thomsen OO, Hanauer SB, McColm J, et al. Maintenance therapy with certolizumab pegol for Crohn's disease. *N Engl J Med* 2007;357:239–50.
- Sokol H, Seksik P, Carrat F, Nion-Larmurier I, Vienne A, Beaugerie L, et al. Usefulness of co-treatment with immunomodulators in patients with inflammatory bowel disease treated with scheduled infliximab maintenance therapy. *Gut* 2010;59:1363–8.
- Lemann M, Mary J-Y, Colombel J-F, Duclos B, Soule J-C, Lerebours E, et al. A randomized, double-blind, controlled withdrawal trial in Crohn's disease patients in long-term remission on azathioprine. *Gastroenterology* 2005;128:1812–8.
- Treton X, Bouhnik Y, Mary JY, Colombel JF, Duclos B, Soule JC, et al. Azathioprine withdrawal in patients with Crohn's disease maintained on prolonged remission: a high risk of relapse. *Clin Gastroenterol Hepatol* 2009;7:80–5.
- Louis E, Mary J-Y, Vernier-Massouille G, Grimaud J-C, Bouhnik Y, Laharie D, et al. Maintenance of remission among patients with Crohn's disease on antimetabolite therapy after infliximab therapy is stopped. *Gastroenterology* 2012;142:63–70.
- Beaugerie L, Brousse N, Bouvier AM, Colombel JF, Lemann M, Cosnes J, et al. Lymphoproliferative disorders in patients receiving thiopurines for inflammatory bowel disease: a prospective observational cohort study. *Lancet* 2009;374:1617–25.
- D'Haens G, Rutgeerts P. Immunosuppression-associated lymphoma in IBD. *Lancet* 2009;374:1572–3.
- Siegel CA, Marden SM, Persing SM, Larson RJ, Sands BE. Risk of lymphoma associated with combination anti-tumor necrosis factor and immunomodulator therapy for the treatment of Crohn's disease: a meta-analysis. *Clin Gastroenterol Hepatol* 2009;7:874–81.
- Biancone L, Petruzzello C, Orlando A, Kohn A, Arduzzone S, Daperno M, et al. Cancer in Crohn's disease patients treated with infliximab: a long-term multicenter matched pair study. *Inflamm Bowel Dis* 2011;17:758–66.
- Lichtenstein GR, Feagan BG, Cohen RD, Salzberg BA, Diamond RH, Chen DM, et al. Serious infections and mortality in association with therapies for Crohn's disease: TREAT registry. *Clin Gastroenterol Hepatol* 2006;4:621–30.
- Felley C, Vader JP, Juillerat P, Pittet V, O'Morain C, Panis Y, et al. Appropriate therapy for fistulizing and fibrostenotic Crohn's disease: results of a multidisciplinary expert panel – EPACT II. *J Crohns Colitis* 2009;3:250–6.
- Juillerat P, Vader JP, Felley C, Pittet V, Gonvers JJ, Mottet C, et al. Appropriate maintenance treatment for Crohn's disease: results of a multidisciplinary international expert panel - EPACT II. *J Crohns Colitis* 2009;3:241–9.
- Michetti P, Stelle M, Juillerat P, Gassull M, Heil FJ, Stange E, et al. Appropriateness of therapy for active Crohn's disease: results of a multidisciplinary international expert panel-EPACT II. *J Crohns Colitis* 2009;3:232–40.
- Mottet C, Vader JP, Felley C, Froehlich F, Gonvers JJ, Juillerat P, et al. Appropriate management of special situations in Crohn's disease (upper gastro-intestinal; extra-intestinal manifestations; drug safety during pregnancy and breastfeeding): results of a multidisciplinary international expert panel-EPACT II. *J Crohns Colitis* 2009;3:257–63.
- Brook RH, Chassin MR, Fink A, Solomon DH, Koseoff J, Park RE. A method for the detailed assessment of the appropriateness of medical technologies. *Int J Technol Assess Health Care* 1986;2:53–63.
- Naylor CD. What is appropriate care? *N Engl J Med* 1998;338:1918–20.
- Fitch K. The Rand/UCLA appropriateness method user's manual. Santa Monica: Rand; 2001.
- Panes J, Bouzas R, Chaparro M, Garcia-Sanchez V, Gisbert JP, Martinez de Guereñu B, et al. Systematic review: the use of ultrasonography, computed tomography and magnetic resonance imaging for the diagnosis, assessment of activity and

- abdominal complications of Crohn's disease. *Aliment Pharmacol Ther* 2011;**34**:125–45.
28. Schoepfer AM, Beglinger C, Straumann A, Trummler M, Vavricka SR, Bruegger LE, et al. Fecal calprotectin correlates more closely with the Simple Endoscopic Score for Crohn's disease (SES-CD) than CRP, blood leukocytes, and the CDAI. *Am J Gastroenterol* 2010;**105**:162–9.
  29. French H, Mark Dalzell A, Srinivasan R, El-Matary W. Relapse rate following azathioprine withdrawal in maintaining remission for Crohn's disease: a meta-analysis. *Dig Dis Sci* 2011;**56**:1929–36.
  30. Waugh AWG, Garg S, Matic K, Gramlich L, Wong C, Sadowski DC, et al. Maintenance of clinical benefit in Crohn's disease patients after discontinuation of infliximab: long-term follow-up of a single centre cohort. *Aliment Pharmacol Ther* 2010;**32**:1129–34.
  31. Sandborn WJ. The future of inflammatory bowel disease therapy: where do we go from here? *Dig Dis* 2012;**30**(Suppl 3):140–4.
  32. Colombel JF, Louis E, Peyrin-Biroulet L, Sandborn WJ, Panaccione R. Deep remission: a new concept? *Dig Dis* 2012;**30**(Suppl 3):107–11.
  33. Baert F, Moortgat L, Van Assche G, Caenepeel P, Vergauwe P, De Vos M, et al. Mucosal healing predicts sustained clinical remission in patients with early-stage Crohn's disease. *Gastroenterology* 2010;**138**:463–8 [quiz e410–461].
  34. Molander P, Sipponen T, Kemppainen H, Jussila A, Blomster T, Koskela R, et al. Achievement of deep remission during scheduled maintenance therapy with TNFalpha-blocking agents in IBD. *J Crohns Colitis* 2013, <http://dx.doi.org/10.1016/j.crohns.2012.10.018>.
  35. Savoye G, Savoye-Collet C. How deep is remission in perianal Crohn's disease and do imaging modalities matter? *Am J Gastroenterol* 2010;**105**:1445–6 [author reply 1446].
  36. Zallot C, Peyrin-Biroulet L. Deep remission in inflammatory bowel disease: looking beyond symptoms. *Curr Gastroenterol Rep* 2013;**15**:315.
  37. Travis S, Feagan BG, Rutgeerts P, van Deventer S. The future of inflammatory bowel disease management: combining progress in trial design with advances in targeted therapy. *J Crohns Colitis* 2012;**6**(Suppl 2):S250–9.
